# Supplementary material for: Anomalous transmittance of polystyrene–ceria nanocomposites at high particle loadings
Source: Royal Society of Chemistry journal article supplement (doi:10.1039/c2tc00084a), 2012-10-18
Supplement: c2tc00084a.pdf [file c2tc00084a.pdf]

## Supporting Information of

### Anomalous transmittance of polystyrene/ceria nanocomposites at high loadings

*Onur Parlak and Mustafa M. Demir\**

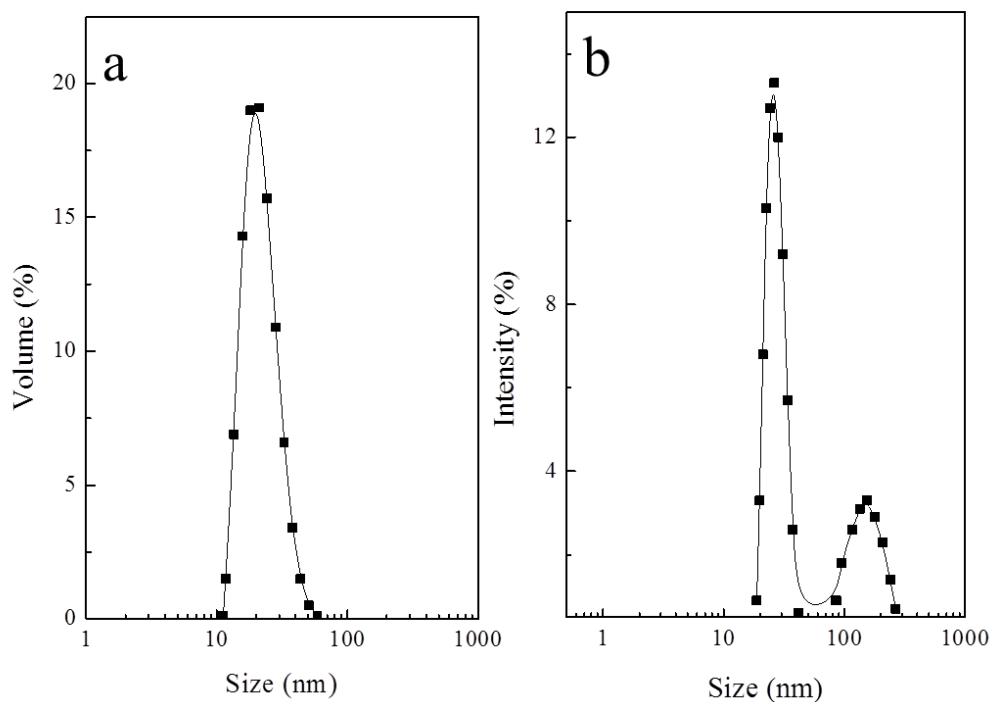

**Figure S1.** DLS (a) volume and (b) intensity size distribution of MPS-modified CeO<sub>2</sub> particles in reaction medium.

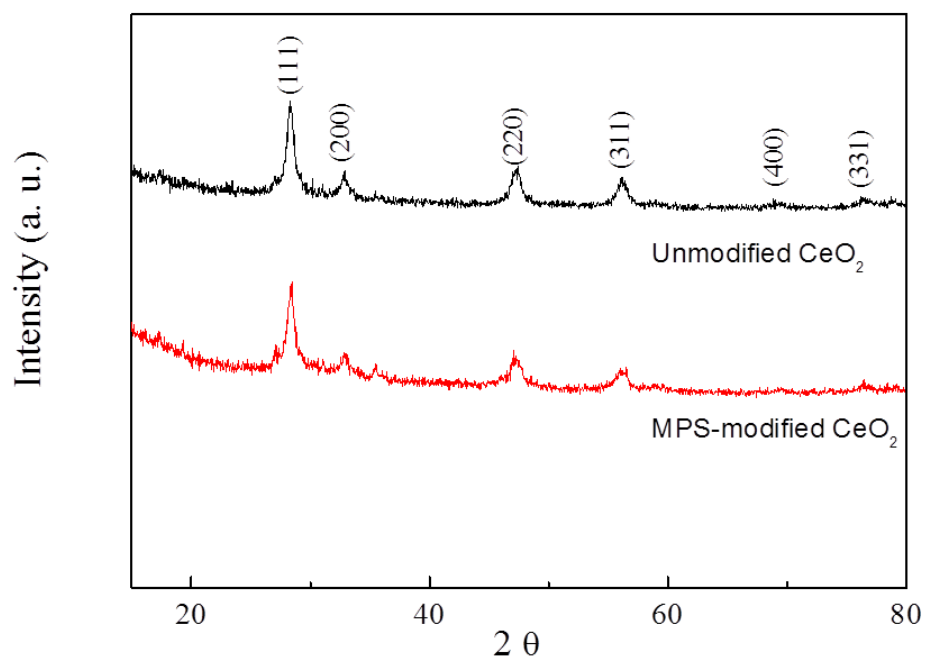

**Figure S2.** XRD patterns of unmodified, MPS-modified CeO<sub>2</sub> nanoparticles.

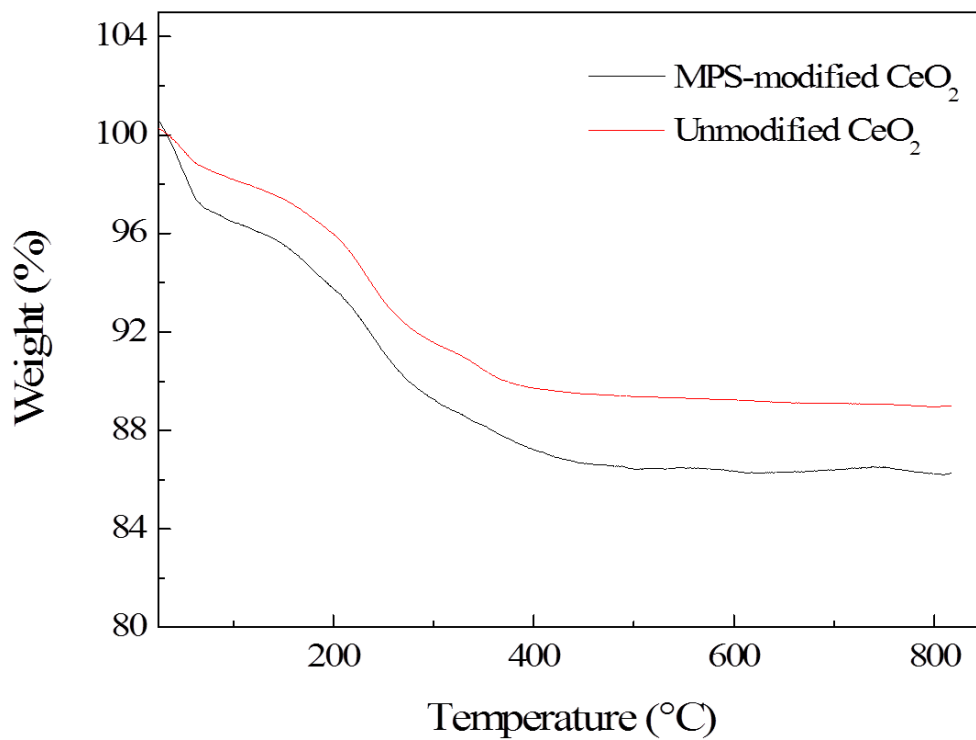

**Figure S3.** TGA curves for unmodified and MPS-modified CeO<sub>2</sub> particles.

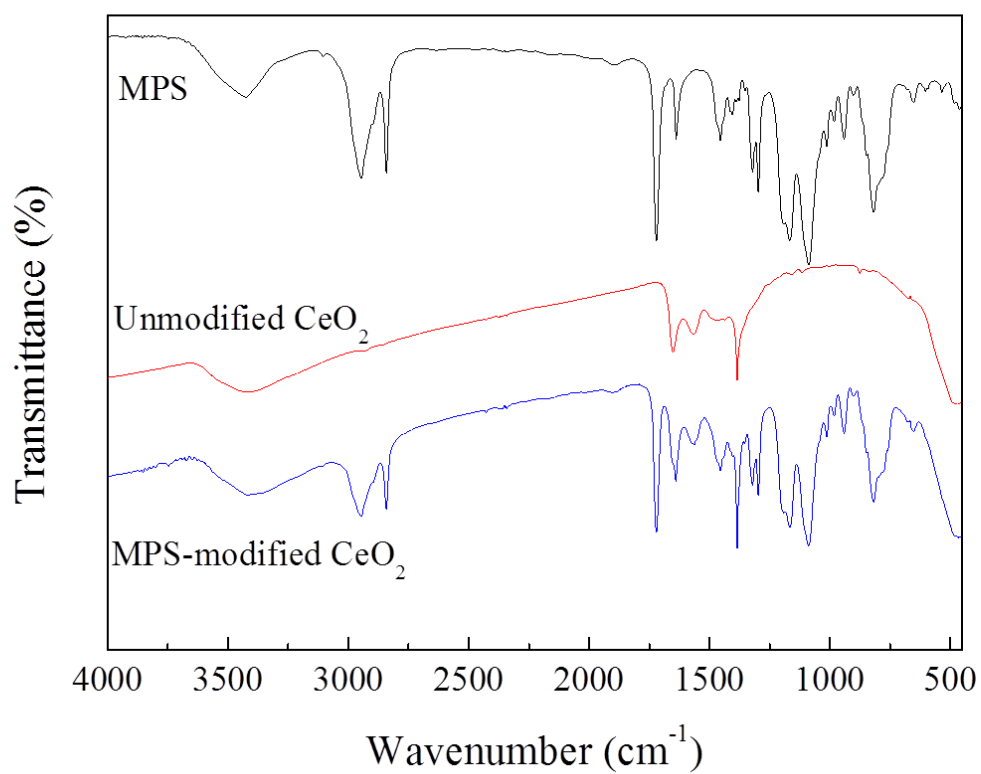

**Figure S4.** FTIR spectra of MPS capping agent, unmodified and MPS-modified CeO<sub>2</sub> particles.
